# Supplementary material for: The Immunogenicity and Safety of Mycobacterium tuberculosis-mosR-Based Double Deletion Strain in Mice
Source: MDPI journal article supplement (doi:10.3390/microorganisms11082105), 2023-08-18
Supplement: s1 [file s1]

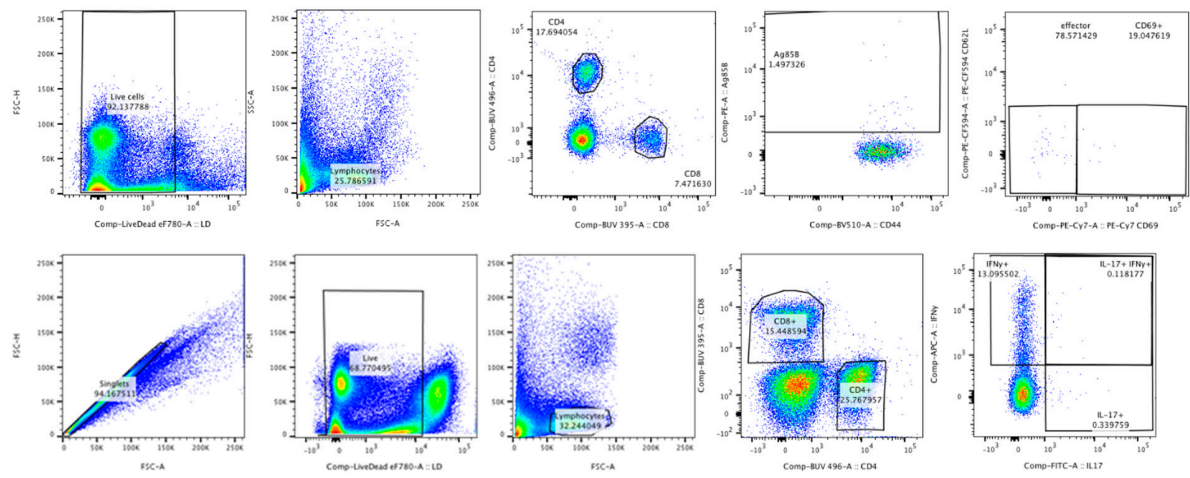

**Supplementary Figure S1.** Examples of Flow Gating Strategy used for Surface stain Samples (top) and intracellular cytokine stains (bottom).

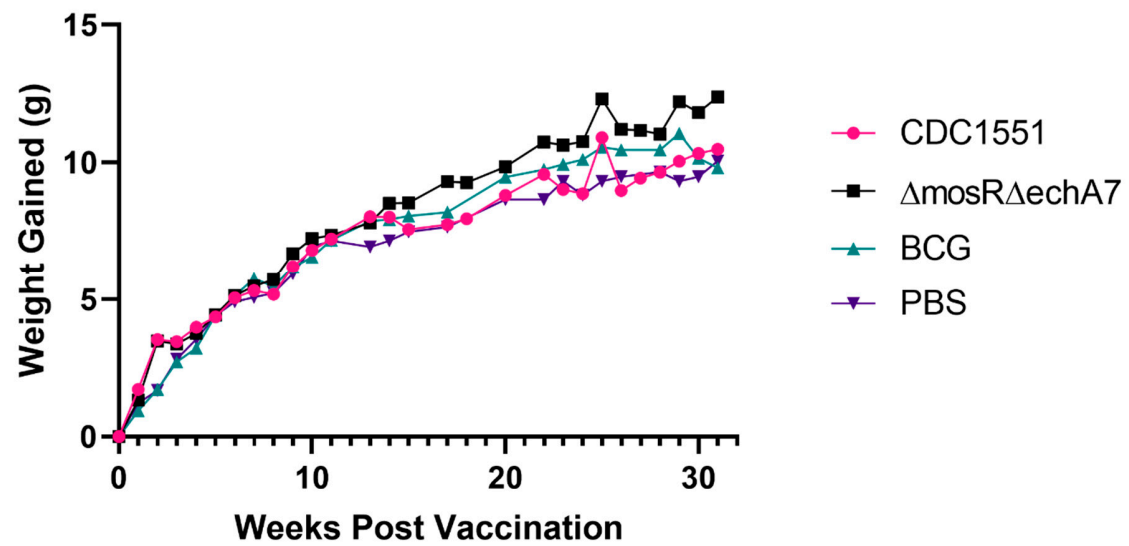

Supplementary Figure S2. Average weight gain (g) of mouse groups over 32 weeks post-vaccination.
